# Supplementary material for: Spatial Patterns of Endometriosis Incidence. A Study in Friuli Venezia Giulia (Italy) in the Period 2004–2017
Source: MDPI journal article supplement (doi:10.3390/ijerph18137175), 2021-07-05
Supplement: s1 [file s1]

## Supplementary File S2: Appendix to Table 2

**Table S2.** Distribution of endometriosis cases and population by age classes.

| Municipality              | Number of<br>cases age<br>15-20 | Number of<br>cases age 21-<br>25 | Number of<br>cases age 26-<br>30 | Number of<br>cases age 31-<br>35 | Number of<br>cases age 36-<br>40 | Number of<br>cases age 41-<br>45 | Number of<br>cases age 46-<br>50 | Women<br>residing in<br>the<br>municipality<br>* age 15-20 | Women<br>residing in<br>the<br>municipality<br>* age 21-25 | Women<br>residing in<br>the<br>municipality<br>* age 26-30 | Women<br>residing in<br>the<br>municipality<br>* age 31-35 | Women<br>residing in<br>the<br>municipality<br>* age 36-40 | Women<br>residing in<br>the<br>municipality<br>* age 41-45 | Women<br>residing in<br>the<br>municipality<br>* age 46-50 |
|---------------------------|---------------------------------|----------------------------------|----------------------------------|----------------------------------|----------------------------------|----------------------------------|----------------------------------|------------------------------------------------------------|------------------------------------------------------------|------------------------------------------------------------|------------------------------------------------------------|------------------------------------------------------------|------------------------------------------------------------|------------------------------------------------------------|
| San Canzian<br>d'Isonzo   | 0                               | 4                                | 3                                | 7                                | 7                                | 13                               | 4                                | 142,21                                                     | 121,50                                                     | 153,57                                                     | 202,93                                                     | 250,21                                                     | 266,43                                                     | 241,00                                                     |
| Staranzano                | 1                               | 1                                | 3                                | 9                                | 5                                | 9                                | 13                               | 193,07                                                     | 141,79                                                     | 154,79                                                     | 209,43                                                     | 272,57                                                     | 302,71                                                     | 294,07                                                     |
| Ronchi dei<br>Legionari   | 0                               | 3                                | 14                               | 12                               | 8                                | 15                               | 10                               | 292,50                                                     | 242,79                                                     | 275,36                                                     | 380,50                                                     | 481,50                                                     | 525,79                                                     | 470,79                                                     |
| Monfalcone                | 1                               | 2                                | 9                                | 20                               | 15                               | 39                               | 28                               | 608,07                                                     | 576,57                                                     | 676,29                                                     | 814,71                                                     | 917,79                                                     | 987,71                                                     | 923,36                                                     |
| Grado                     | 1                               | 2                                | 6                                | 6                                | 8                                | 10                               | 8                                | 169,57                                                     | 168,00                                                     | 191,14                                                     | 226,43                                                     | 269,57                                                     | 309,57                                                     | 329,21                                                     |
| Lusevera                  | 0                               | 2                                | 1                                | 2                                | 0                                | 1                                | 0                                | 12,00                                                      | 12,29                                                      | 15,21                                                      | 18,64                                                      | 20,36                                                      | 25,07                                                      | 24,43                                                      |
| San Lorenzo<br>Isontino   | 0                               | 0                                | 4                                | 2                                | 0                                | 0                                | 5                                | 28,43                                                      | 23,71                                                      | 38,36                                                      | 50,57                                                      | 62,79                                                      | 65,93                                                      | 59,29                                                      |
| Fiumicello                | 0                               | 3                                | 3                                | 2                                | 5                                | 8                                | 5                                | 106,21                                                     | 96,07                                                      | 127,93                                                     | 169,57                                                     | 189,57                                                     | 183,21                                                     | 178,50                                                     |
| Codroipo                  | 1                               | 5                                | 6                                | 16                               | 16                               | 16                               | 12                               | 335,93                                                     | 343,29                                                     | 459,07                                                     | 554,29                                                     | 593,64                                                     | 616,29                                                     | 576,57                                                     |
| Mariano del<br>Friuli     | 0                               | 0                                | 1                                | 2                                | 0                                | 4                                | 3                                | 36,29                                                      | 27,00                                                      | 37,14                                                      | 52,36                                                      | 57,36                                                      | 58,57                                                      | 50,14                                                      |
| Morsano al<br>Tagliamento | 0                               | 0                                | 2                                | 2                                | 4                                | 5                                | 2                                | 58,64                                                      | 59,14                                                      | 72,21                                                      | 83,43                                                      | 96,00                                                      | 98,14                                                      | 100,07                                                     |
| Latisana                  | 1                               | 2                                | 16                               | 20                               | 9                                | 10                               | 6                                | 325,29                                                     | 294,71                                                     | 378,43                                                     | 480,07                                                     | 550,93                                                     | 577,00                                                     | 543,36                                                     |
| Gradisca<br>d'Isonzo      | 0                               | 2                                | 2                                | 4                                | 7                                | 5                                | 11                               | 156,93                                                     | 123,00                                                     | 142,71                                                     | 191,14                                                     | 238,71                                                     | 275,29                                                     | 272,93                                                     |
| Capriva del<br>Friuli     | 0                               | 0                                | 2                                | 3                                | 3                                | 2                                | 1                                | 40,93                                                      | 33,64                                                      | 41,29                                                      | 56,21                                                      | 70,50                                                      | 77,29                                                      | 71,93                                                      |
| Turriaco                  | 1                               | 1                                | 1                                | 5                                | 2                                | 2                                | 4                                | 58,79                                                      | 45,86                                                      | 67,14                                                      | 94,50                                                      | 117,86                                                     | 124,79                                                     | 108,29                                                     |
| Prata di<br>Pordenone     | 1                               | 6                                | 9                                | 6                                | 2                                | 9                                | 9                                | 209,50                                                     | 216,29                                                     | 275,21                                                     | 323,21                                                     | 344,93                                                     | 326,93                                                     | 284,79                                                     |
| Barcis                    | 0                               | 0                                | 0                                | 0                                | 0                                | 2                                | 0                                | 3,36                                                       | 4,21                                                       | 4,36                                                       | 4,14                                                       | 4,79                                                       | 9,36                                                       | 10,64                                                      |
| Polcenigo                 | 0                               | 1                                | 2                                | 2                                | 1                                | 5                                | 6                                | 66,00                                                      | 55,21                                                      | 76,36                                                      | 105,07                                                     | 130,43                                                     | 132,57                                                     | 121,07                                                     |
| Cordenons                 | 1                               | 6                                | 9                                | 15                               | 17                               | 19                               | 11                               | 470,57                                                     | 416,00                                                     | 469,21                                                     | 563,57                                                     | 691,14                                                     | 770,71                                                     | 748,07                                                     |
| Fiume Veneto              | 1                               | 2                                | 9                                | 11                               | 10                               | 9                                | 11                               | 289,57                                                     | 250,36                                                     | 320,14                                                     | 409,00                                                     | 467,29                                                     | 485,86                                                     | 436,43                                                     |
| Arba                      | 1                               | 0                                | 2                                | 1                                | 2                                | 1                                | 1                                | 27,71                                                      | 27,36                                                      | 40,64                                                      | 40,93                                                      | 48,36                                                      | 49,50                                                      | 47,07                                                      |

|                       |   |   |   |   |   |   |   |       |       |       |       |       |       |       |
|-----------------------|---|---|---|---|---|---|---|-------|-------|-------|-------|-------|-------|-------|
| Dolegna del<br>Collio | 0 | 0 | 0 | 1 | 1 | 0 | 1 | 8,79  | 7,79  | 8,86  | 8,71  | 12,71 | 19,07 | 16,93 |
| Mossa                 | 0 | 1 | 1 | 3 | 0 | 3 | 1 | 36,50 | 30,36 | 37,21 | 42,79 | 59,57 | 71,00 | 67,79 |

\*Numbers represent the sum of women residing in the municipality in the fourteen years considered.
